# Supplementary material
Source: PubMed Central journal article supplement (PMC8188728)
Supplement: mmc2.pdf [file mmc2.pdf]

**Table S1. Cryo-EM Data Collection and Refinement Statistics, Related to Figures 1-2.**

| SARS-CoV-2 S2P complex                          | 1-57 Fab               | 2-7 Fab                |
|-------------------------------------------------|------------------------|------------------------|
| <b>EMDB ID</b>                                  | EMD-23506              | EMD-23507              |
| <b>PDB ID</b>                                   | 7LS9                   | 7LSS                   |
| <u>Data Collection</u>                          |                        |                        |
| Microscope                                      | FEI Titan<br>Krios     | FEI Titan<br>Krios     |
| Voltage (kV)                                    | 300                    | 300                    |
| Electron dose (e <sup>-</sup> /Å <sup>2</sup> ) | 41.92                  | 51.69                  |
| Detector                                        | Gatan K3<br>BioQuantum | Gatan K3<br>BioQuantum |
| Pixel Size (Å)                                  | 1.07                   | 1.058                  |
| Defocus Range (µm)                              | -0.8/-2.5              | -0.5/-2.5              |
| Magnification                                   | 81000                  | 81000                  |
| <u>Reconstruction</u>                           |                        |                        |
| Software                                        | cryoSPARC<br>v2.15     | cryoSPARC<br>v2.15     |
| Particles                                       | 89,601                 | 165,576                |
| Symmetry                                        | C3                     | C1                     |
| Box size (pix)                                  | 420                    | 384                    |
| Resolution (Å) (FSC <sub>0.143</sub> )          | 3.42                   | 3.72                   |
| <u>Refinement</u>                               |                        |                        |
| Software                                        | Phenix 1.18            | Phenix 1.18            |
| Protein residues                                | 4002                   | 2783                   |
| Chimera CC                                      | 0.83                   | 0.79                   |
| EMRinger Score                                  | 2.14                   | 3.13                   |
| R.m.s. deviations                               |                        |                        |
| Bond lengths (Å)                                | 0.006                  | 0.011                  |
| Bond angles (°)                                 | 1.11                   | 1.066                  |
| <u>Validation</u>                               |                        |                        |
| Molprobrity score                               | 1.38                   | 1.15                   |
| Clash score                                     | 4.32                   | 1.08                   |
| Favored rotamers (%)                            | 100                    | 100                    |
| Ramachandran                                    |                        |                        |
| Favored regions (%)                             | 97.0                   | 95.09                  |
| Allowed regions (%)                             | 3.0                    | 4.91                   |
| Disallowed regions (%)                          | 0                      | 0                      |
